# Supplementary material
Source: Springer Nature journal article supplement (https://www.springermedizin.de/resource/supplementary/12889_2014_7346_MOESM2_ESM.pdf/9497374)

**(a) Intervention contact**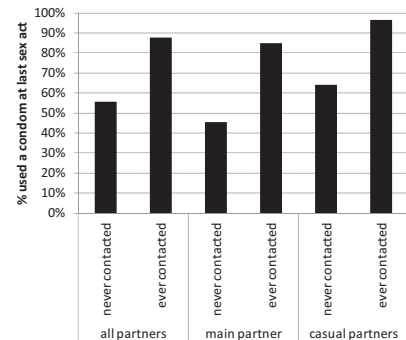**(b) Given condoms**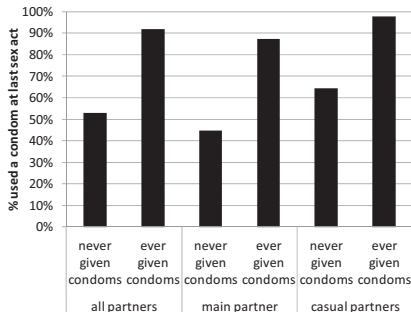**(c) Seen a condom demonstration**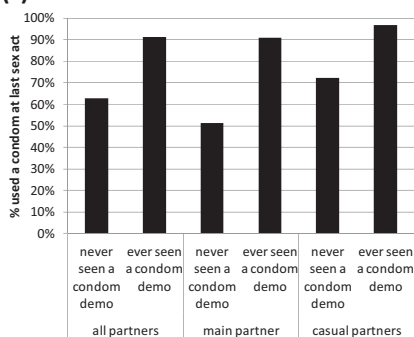**(d) Time since first contacted**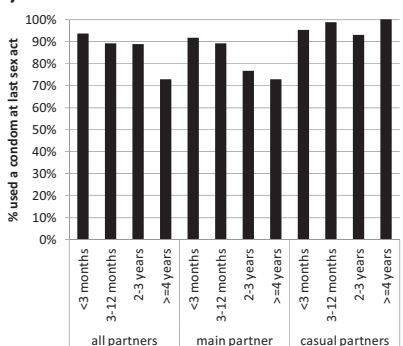**(e) Number of times contacted last month**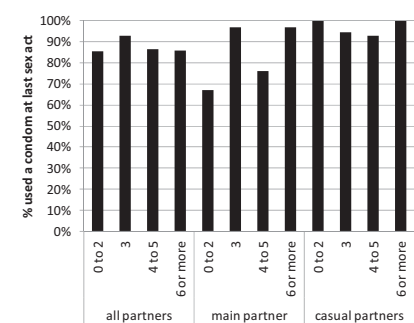**(f) Number of condoms given last time**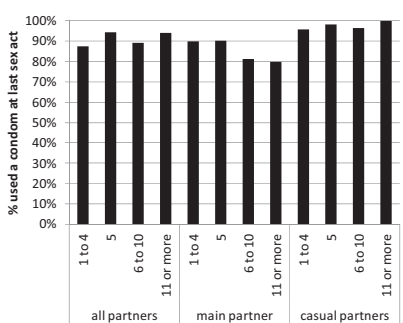**(g) Number of condom demonstrations seen last month**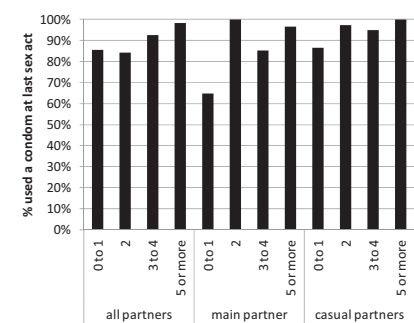

Supplement: MOESM2 [file 9497374]
